# Supplementary material for: Bacillus anthracis lethal toxin negatively modulates ILC3 function through perturbation of IL-23-mediated MAPK signaling
Source: PubMed Central journal article supplement (PMC5695638; doi:10.1371/journal.ppat.1006690), 2017-10-23

# Supplemental Figure 3

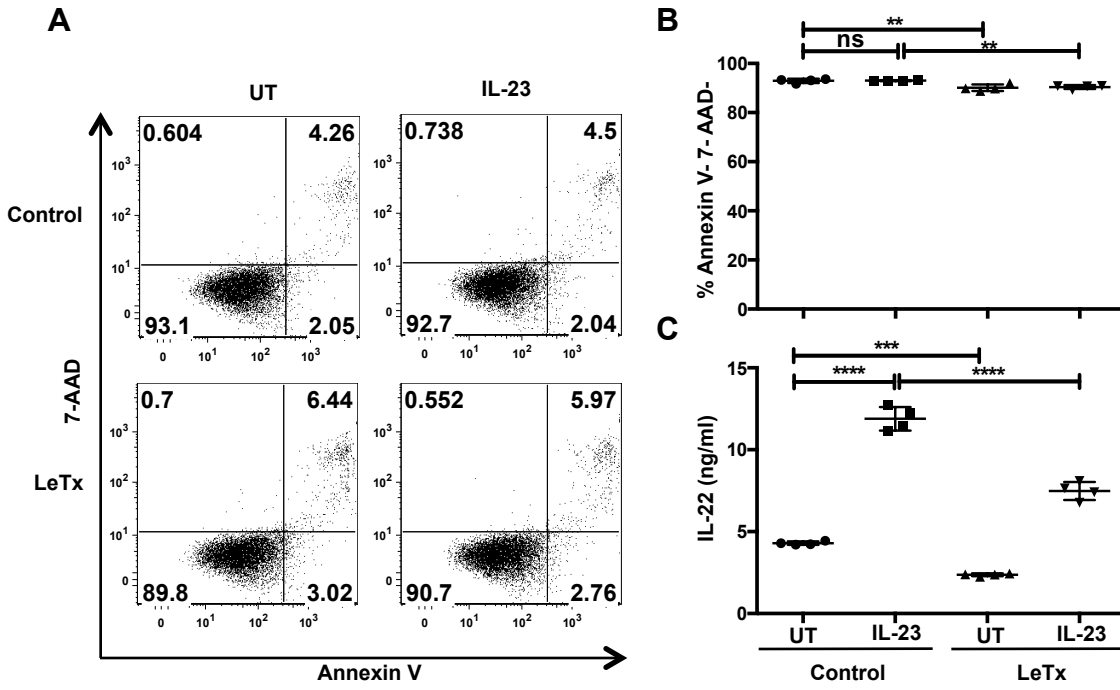

Supplement: ppat.1006690.s003.pdf [file ppat.1006690.s003.pdf]
